# Supplementary material for: Saccharomyces boulardii alleviates DSS-induced intestinal barrier dysfunction and inflammation in humanized mice
Source: Royal Society of Chemistry journal article supplement (doi:10.1039/d1fo02752b), 2021-11-16
Supplement: d1fo02752b1.pdf [file d1fo02752b1.pdf]

Supplementary information for

***Saccharomyces boulardii* Alleviates DSS-Induced Intestinal Barrier  
Dysfunction and Inflammation in Humanized Mice**

**Supplementary Figure Caption:**

**Figure S1** Body weight change.

**Supplementary Table Captions:**

**Table S1** Information of the *Saccharomyces boulardii*-derived molecules.

**Table S2** Synthetic microbiota (SM) strain list.

**Table S3** Scoring system to calculate Disease Activity Index (DAI).

**Table S4** Primers used in Real-Time PCR assay.

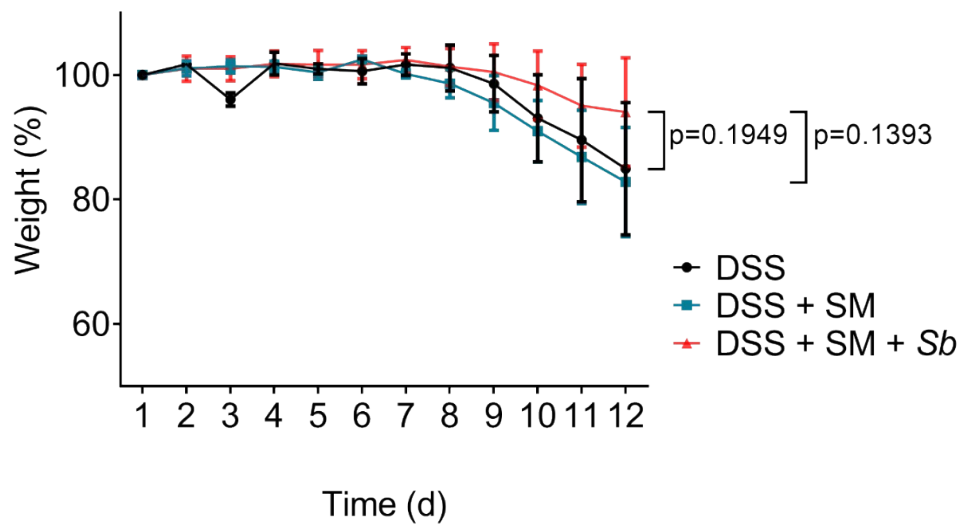

**Figure S1** Body weight change. n = 5 mice per group. Mean values  $\pm$  SD are presented, p values were calculated using Unpaired T-test.

**Table S1.** Information of the *Saccharomyces boulardii*-derived molecules.

| Extracts                       | Extraction methods | Purity (%)                                                            |
|--------------------------------|--------------------|-----------------------------------------------------------------------|
| Cell wall                      | Enzyme hydrolysis  | $\beta$ -glucans and mannan $\geq 56.2\%$<br>; Protein $\geq 18.3\%$  |
| Cell wall hydrolysates         | Enzyme hydrolysis  | $\beta$ -glucans and mannan $\geq 66.5\%$<br>%; Protein $\geq 21.0\%$ |
| Insoluble $\beta$ -glucans     | Enzyme hydrolysis  | $\geq 88.9\%$                                                         |
| Water-soluble $\beta$ -glucans | Enzyme hydrolysis  | $\geq 94.2\%$                                                         |
| Mannan                         | Enzyme hydrolysis  | $\geq 73.9\%$                                                         |
| Polypeptides                   | Enzyme hydrolysis  | $\geq 76.3\%$                                                         |

**Table S2** Synthetic microbiota (SM) strain list.

| Species                                  | Strain         | Source   |
|------------------------------------------|----------------|----------|
| <i>Akkermansia muciniphila</i>           | DSM 22959      | DSMZ     |
| <i>Bacillus pumilus</i>                  | red1           | Isolated |
| <i>Bacteroides caccae</i>                | CNGBCC 1800358 | BGI      |
| <i>Bacteroides cellulosilyticus</i>      | DSM 108229     | DSMZ     |
| <i>Bacteroides clarus</i>                | CNGBCC 1801343 | BGI      |
| <i>Bacteroides coprocola</i>             | CNGBCC 1801377 | BGI      |
| <i>Bacteroides dorei</i>                 | CNGBCC 1800738 | BGI      |
| <i>Bacteroides eggerthii</i>             | CNGBCC 1800652 | BGI      |
| <i>Bacteroides fragilis</i>              | WWZ0331        | Isolated |
| <i>Bacteroides fragilis</i>              | CNGBCC 1800256 | BGI      |
| <i>Bacteroides intestinalis</i>          | DSM 17393      | DSMZ     |
| <i>Bacteroides stercoris</i>             | CNGBCC 1800163 | BGI      |
| <i>Bacteroides thetaiotaomicron</i>      | CNGBCC 1800698 | BGI      |
| <i>Bacteroides uniformis</i>             | CNGBCC 1800263 | BGI      |
| <i>Bacteroides vulgatus</i>              | CNGBCC 1800357 | BGI      |
| <i>Bacteroides vulgatus</i>              | CNGBCC 1800621 | BGI      |
| <i>Bifidobacterium adolescentis</i>      | D15            | Isolated |
| <i>Bifidobacterium animalis</i>          | BB12           | Lab      |
| <i>Bifidobacterium bifidum</i>           | C3             | Isolated |
| <i>Bifidobacterium breve</i>             | BNCC 185972    | Lab      |
| <i>Bifidobacterium infantisreuter</i>    | BNCC 341709    | Lab      |
| <i>Bifidobacterium lactis</i>            | NH019          | Lab      |
| <i>Bifidobacterium longum</i>            | R175           | Lab      |
| <i>Bifidobacterium pseudocatenulatum</i> | JWA256         | Isolated |

|                                                |                |          |
|------------------------------------------------|----------------|----------|
| <i>Blautia obeum</i>                           | CNGBCC 1801685 | BGI      |
| <i>Butyrivibrio crossotus</i>                  | CNGBCC 1850014 | BGI      |
| <i>Clostridium bolteae</i>                     | CNGBCC 1850021 | BGI      |
| <i>Clostridium butyricum</i>                   | DS1            | Lab      |
| <i>Clostridium perfringens</i>                 | CNGBCC 1800374 | BGI      |
| <i>Clostridium leptum</i>                      | DSM 753        | DSMZ     |
| <i>Collinsella aerofaciens</i>                 | CNGBCC 1800740 | BGI      |
| <i>Coprococcus comes</i>                       | ATCC 27758     | ATCC     |
| <i>Dorea formicigenerans</i>                   | CNGBCC 1850024 | BGI      |
| <i>Enterococcus faecalis</i>                   | BNCC 186300    | Lab      |
| <i>Erysipelatoclostridium ramosum</i>          | CNGBCC 1800439 | BGI      |
| <i>Escherichia coli</i>                        | K12            | Lab      |
| <i>Eubacterium rectale</i>                     | CNGBCC 1801156 | BGI      |
| <i>Fusobacterium nucleatum subsp. Animalis</i> | CNGBCC 1850029 | BGI      |
| <i>Lactobacillus acidophilus</i>               | B2023          | Isolated |
| <i>Lactobacillus brevis</i>                    | M1019          | Isolated |
| <i>Lactobacillus casei</i>                     | A8             | Isolated |
| <i>Lactobacillus crispatus</i>                 | JQ1            | Lab      |
| <i>Lactobacillus delbrueckii</i>               | CNGBCC 1801758 | BGI      |
| <i>Lactobacillus delbrueckii subsp.</i>        | BNCC 137361    | Lab      |
| <i>Lactobacillus fermentum</i>                 | CNGBCC 1800629 | BGI      |
| <i>Lactobacillus fermentus</i>                 | 557            | Lab      |
| <i>Lactobacillus gasseri</i>                   | M1009          | Isolated |
| <i>Lactobacillus helveticus</i>                | R52            | Lab      |
| <i>Lactobacillus paracasei</i>                 | LPC37          | Lab      |
| <i>Lactobacillus plantarum</i>                 | WCFS1          | Lab      |
| <i>Lactobacillus plantarum</i>                 | CNGBCC 1800069 | BGI      |

|                                                       |                |          |
|-------------------------------------------------------|----------------|----------|
| <i>Lactobacillus reuteri</i>                          | M1011          | Isolated |
| <i>Lactobacillus rhamnosus</i>                        | LGG            | Lab      |
| <i>Lactobacillus ruminis</i>                          | CNGBCC 1800650 | BGI      |
| <i>Lactobacillus sakei subsp. sakei</i>               | BNCC 185970    | Lab      |
| <i>Lactobacillus salivarius</i>                       | CNGBCC 1800727 | BGI      |
| <i>Lactobacillus vaginalis</i>                        | CNGBCC 1800088 | BGI      |
| <i>Lactococcus garvieae</i>                           | JWA207         | BGI      |
| <i>Lactococcus lactis</i>                             | CNGBCC 1801004 | BGI      |
| <i>Leuconostoc mesenteroides</i>                      | BNCC 195309    | Lab      |
| <i>Leuconostoc mesenteroides subsp. Mesenteroides</i> | BNCC 353743    | Lab      |
| <i>Odoribacter splanchnicus</i>                       | CNGBCC 1800731 | BGI      |
| <i>Parabacteroides distasonis</i>                     | CNGBCC 1800352 | BGI      |
| <i>Parabacteroides merdae</i>                         | CNGBCC 1800675 | BGI      |
| <i>Pediococcus acidilactici</i>                       | JWA175         | Lab      |
| <i>Prevotella copri</i>                               | CNGBCC 1802008 | BGI      |
| <i>Roseburia hominis</i>                              | CNGBCC 1850049 | BGI      |
| <i>Roseburia intestinalis</i>                         | CNGBCC 1850050 | BGI      |
| <i>Roseburia inulinivorans</i>                        | DSM 108070     | DSMZ     |
| <i>Ruminococcus bromii</i>                            | CNGBCC 1800554 | BGI      |
| <i>Ruminococcus gnavus</i>                            | CNGBCC 1800747 | BGI      |
| <i>Ruminococcus lactaris</i>                          | ATCC 29176     | ATCC     |
| <i>Ruminococcus obeum</i>                             | JCM 31340      | Lab      |
| <i>Ruminococcus torques</i>                           | CNGBCC 1800479 | BGI      |
| <i>Sporosarcina koreensis</i>                         | PC9            | Isolated |
| <i>Streptococcus salivarius</i>                       | CNGBCC 1800167 | BGI      |
| <i>Streptococcus thermophilus Orla-Jensen</i>         | BNCC 335885    | Lab      |



**Table S3** Scoring system to calculate Disease Activity Index (DAI)<sup>(a)</sup>.

| Score | Body weight decrease (%) | Stool consistency     | Bleeding in feces |
|-------|--------------------------|-----------------------|-------------------|
| 0     | None                     | Normal <sup>(b)</sup> | No bleeding       |
| 1     | 0.1-5                    | -                     | -                 |
| 2     | 5-10                     | Loose                 | Slight bleeding   |
| 3     | 10-20                    | -                     | -                 |
| 4     | >20                      | Diarrhea              | Gross bleeding    |

(a) The DAI is calculated as the sum of the scores for weight loose, stool consistency, and bleeding in feces.



**Table S4** Primers used in Real-Time PCR assay.

| Primer name       | Sequence                  |
|-------------------|---------------------------|
| $\beta$ -actin(F) | TGGATGACGATATCGCTGCG      |
| $\beta$ -actin(R) | AGGGTCAGGATACCTCTCTT      |
| IL-1 $\beta$ (F)  | GCTTCAGGCAGGCAGTATCA      |
| IL-1 $\beta$ (R)  | TGCAGTTGTCTAATGGGAACG     |
| IL-6(F)           | CCGGAGAGGAGACTTCACAG      |
| IL-6(R)           | TCCACGATTTCCCAGAGAAC      |
| IL-10(F)          | GGTTGCCAAGCCTTATCGGA      |
| IL-10(R)          | ACCTGCTCCACTGCCTTGCT      |
| IL-12(F)          | GTGAACCTCACCTGTGACACGC    |
| IL-12(R)          | TGAATACTTCTCATAGTCCCTTTGG |
| IL-17(F)          | GCAAGAGATCCTGGTCCTGA      |
| IL-17(R)          | AGCATCTTCTCGACCCTGAA      |
| IL-18(F)          | AAGTAAGAGGACTGGCTGTG      |
| IL-18(R)          | CTCGGGTATTCTGTTATGGA      |
| IL-23(F)          | CCAGCAGCTCTCTCGGAATC      |
| IL-23(R)          | GATTCATATGTCCCGCTGGTG     |
| CXCL-1(F)         | CCCAAATCTACAAGTAGCC       |
| CXCL-1(R)         | GATACACCTCTTGACGATC       |
| TNF- $\alpha$ (F) | AGCCGATGGGTTGTA           |
| TNF- $\alpha$ (R) | ACTTGGGCAGATTGA           |
